# Supplementary material
Source: PubMed Central journal article supplement (PMC4277089)

Supplement Figure 4: AO/EthBr viability Assay with W303

W303  
Control

W303  
Brd II

W303  
DD

W303  
DF

AO  
(live cells)

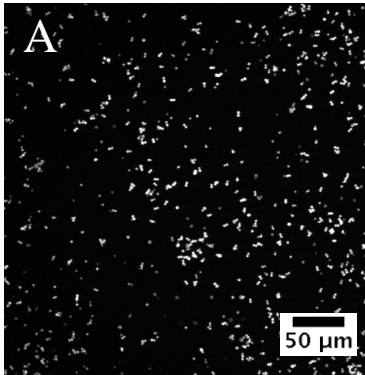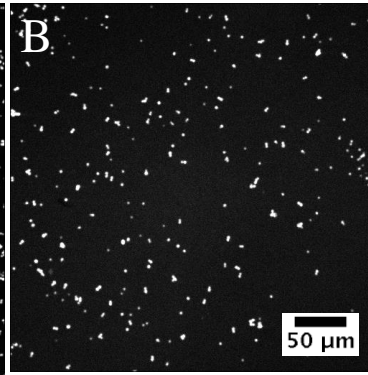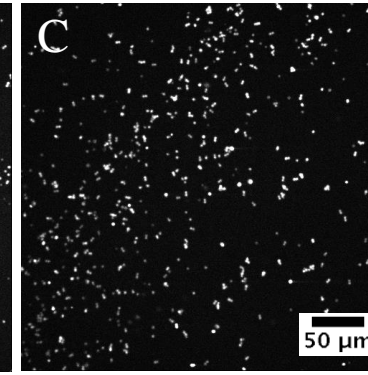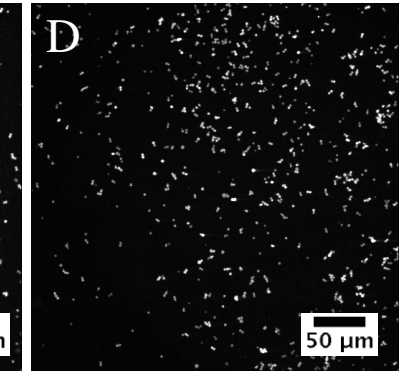

Eth Br  
(dead cells)

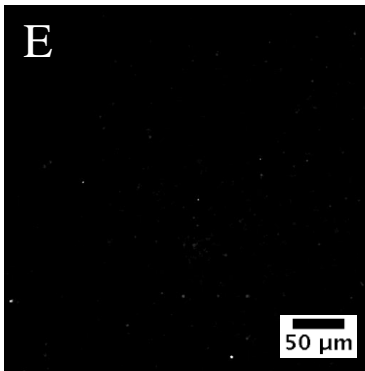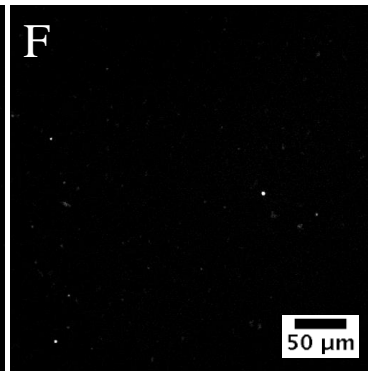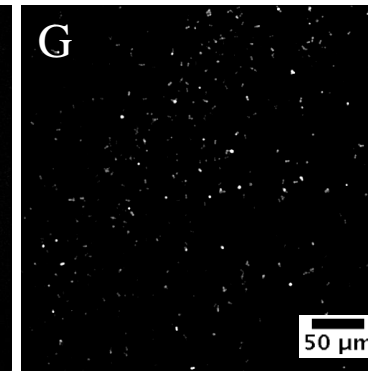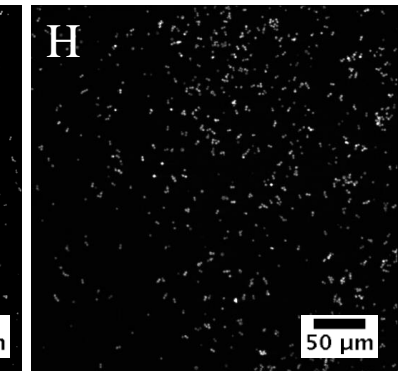

Supplement: rsif20140999supp4.pdf [file rsif20140999supp4.pdf]
