# Supplementary material
Source: PubMed Central journal article supplement (PMC4277089)

## Supplemental figure 2: Yeast Cell Hydrophobicity

A. Before Vortex

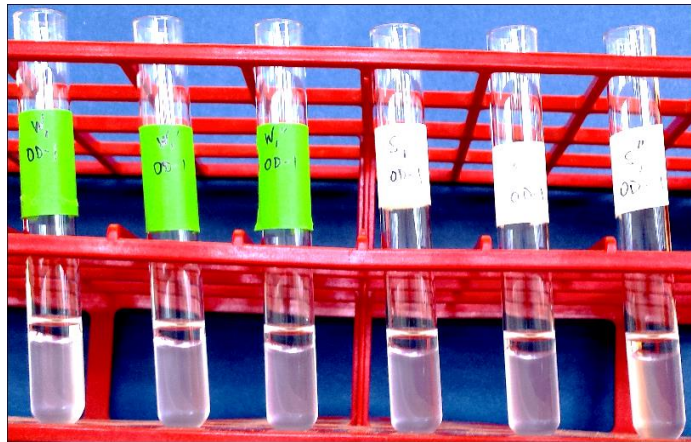

W303

SK1

B. Post Vortex

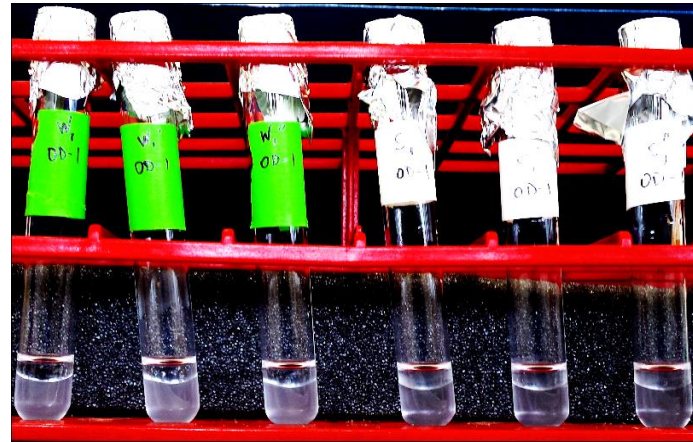

W303

SK1

Supplement: rsif20140999supp2.pdf [file rsif20140999supp2.pdf]

Supplemental Figure 5: Yeast cell rupture on native/uncoated NSS

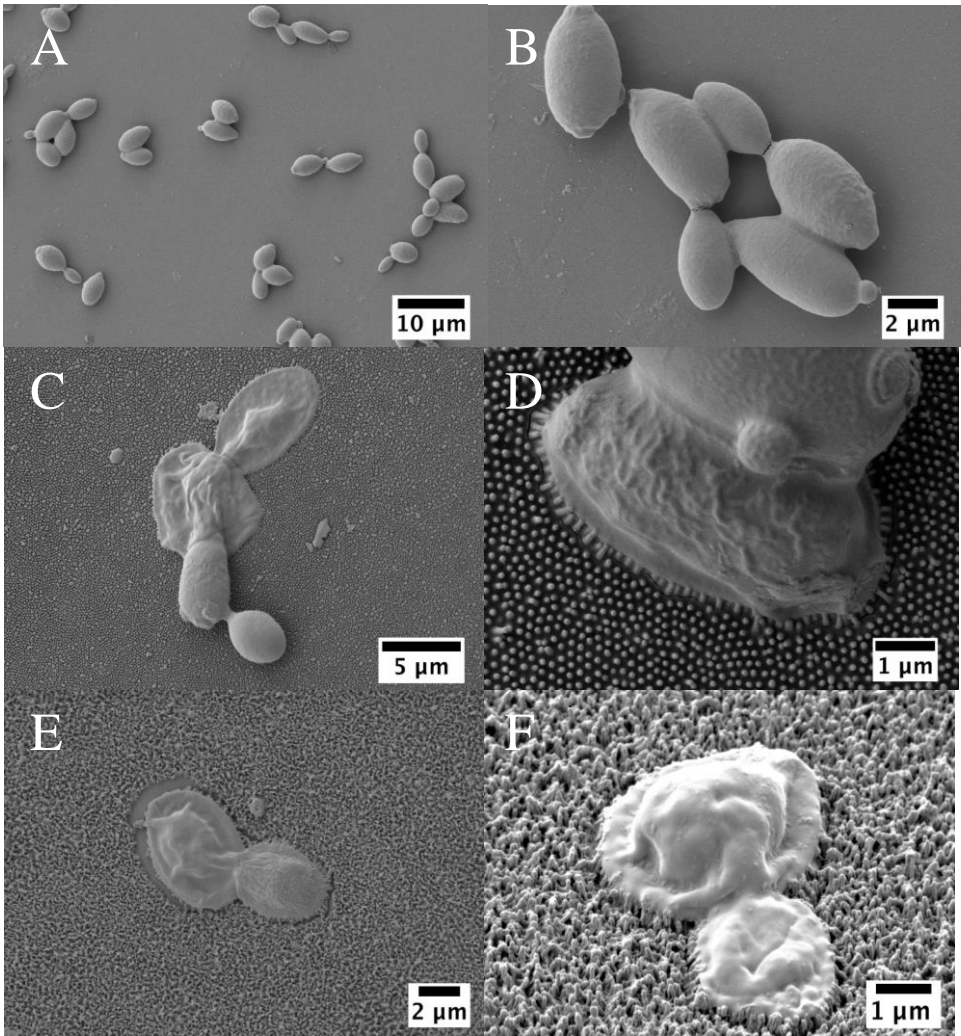

Supplement: rsif20140999supp5.pdf [file rsif20140999supp5.pdf]
